# Supplementary material for: Na+-Mediated aggregation of imino-carboxylate transition metal complexesElectronic supplementary information (ESI) available: further crystallographic details. See http://www.rsc.org/suppdata/dt/b1/b107873a/
Source: Royal Society of Chemistry journal article supplement (doi:10.1039/b107873a), 2001-10-11
Supplement: b107873a.doc [file b107873a.doc]

**SUPPLEMENTARY CRYSTALLOGRAPHIC DATA:**

**Single Crystal X-Ray Structure of {[Mn(L)]2Na4Cl2.13H2O}** **2**

*Crystal Data:* C30H68N8O25Cl2Na4Mn2, *M* = 1213.66, trigonal, space group *P*-3, *a* = 9.004(5), *c* = 18.119(12)Å, *U* = 1272.0(14)Å3, [from 26 reflections measured at ±ω (30  2θ  34, λ = 0.71073Å)], *T* = 150(2)K, *D*c = 1.584 gcm-3, *Z* = 1, μ(Mo-*K*α) = 0.725mm-1, *F*(000) = 632.

*Data Collection and Processing*: A yellow, equant block plate, 0.51 x 0.51 x 0.33mm was mounted in RS3000 perfluoropolyether oil on a Stoë Stadi-4 four-circle diffractometer, equipped with a low temperature device. Data were acquired using graphite-monochromated Mo-*K*α *X*-radiation using ω/2θ scans. Of the 3090 reflections collected (2θmax = 50, -10  *h*  10, -9  *k*  10, 0  *l*  21), 1513 were unique (Rint = 0.0179) and 1353 had *F*  4σ(*F*). An absorption correction based on _ scans was applied with *T*min = 0.109 and *T*max = 0.770.

*Structure Analysis and Refinement:* The atoms were located using Patterson methods and difference Fourier syntheses (SHELXL-97). All non-hydrogen atoms were refined anisotropically. The methylene hydrogen atoms were placed geometrically, the methyl and water hydrogen atoms were located in a difference Fourier synthesis. The hydrogen atoms were allowed to ride on their respective parent atoms. Of the two crystallographically independent Na atoms in the asymmetric unit, one was disordered with a water molecule; the two disordered components were equally occupied and refined using anisotropic thermal parameters. The carbon atom next to the bridgehead tertiary nitrogen was disordered over two equally occupied sites and refined using anisotropic thermal parameters. In the asymmetric unit, the Cl atoms were located on three separate positions, each was disordered with solvent water molecules; they were refined using anisotropic thermal parameters with their occupancies restrained so that the total charge in the crystal was zero. At final convergence, *R*1 [*F*  4σ(*F*)] = 0.0345, and *wR*2 [all data] = 0.0935 for 176 parameters. The weighting scheme *w*-1 = [σ2(*F*o2) + (0.0424*P*)2 + 1.1834*P*], where *P* = [MAX(*F*o2, 0) + 2*F*c]/3, gave satisfactory agreement analyses. The largest peaks in the final Fourier synthesis were 0.68 and -0.26 eÅ-3. In the final least squares cycle (Δ/σ)max was 0.1.

**Single Crystal X-Ray Structure of {[Mn(L)]Na(MeOH)2}2 3**

*Crystal Data:* C36H66N8O18Mn2Na2, *M* = 1054.82, triclinic, space group *P*-1, *a* = 10.094(3), *b* = 11.423(5), *c* = 12.613(3)Å, α = 104.16(4), β = 107.27(3), γ =106.27(3), *U* = 1245.0(6)Å3, [from 28 reflections measured at ±ω (30  2θ  34, λ = 0.71073Å)], *T* = 150(2)K, *D*c = 1.407 gcm-3, *Z* = 1, μ(Mo-*K*α) = 0.600mm-1, *F*(000) = 544.

*Data Collection and Processing*: A pale yellow prism, 0.78 x 0.62 x 0.46mm was mounted in RS3000 perfluoropolyether oil on a two stage fibre and transferred to a Stoë Stadi-4 four-circle diffractometer, equiped with a low temperature device. Data were acquired using graphite-monochromated Mo-*K*α *X*-radiation using ω-θ scans. Of the 4402 data collected (2θmax = 50, -12  *h*  11, -13  *k*  13, 0  *l*  15), 4381 were unique (Rint = 0.0123) and 4058 had *F*  4σ(*F*). An absorption correction based on _ scans was applied with *T*min = 0.5425 and *T*max = 0.6153.

*Structure Analysis and Refinement:* The atoms were located using direct methods and difference Fourier syntheses (SHELXL-97). All fully occupied non-hydrogen atoms were refined anisotropically. The methylene hydrogen atoms were placed geometrically, the methyl and MeOH hydrogen atoms were located in a difference Fourier synthesis, and the free solvent hydrogen atoms were not found. All hydrogen atoms were allowed to ride on their respective parent atoms. The free solvent MeOH were refined isotropically over three partially occupied sites, with the C-O bond length restained to be equivalent in all three dis-ordered components. At final convergance, *R*1 [*F*  4σ(*F*)] = 0.0494, and *wR*2 [all data] = 0.1366 for 312 parameters. The weighting scheme *w*-1 = [σ2(*F*o2) + (0.0718*P*)2 + 2.406*P*], where *P* = [MAX(*F*o2, 0) + 2*F*c]/3, gave satisfactory agreement analyses. The largest peaks in the final Fourier synthesis were 0.85 and -0.53 eÅ-3. In the final least squares cycle (Δ/σ)max was 0.002.

**Single Crystal X-Ray Structure of {[Mn(L)]Na(H2O)2}2 4**

*Crystal Data:* C30H62N8O22Mn2Na2, *M* = 1024.74, triclinic, space group *P*-1, *a* = 10.062(4), *b* = 11.572(4), *c* = 12.334(10)Å, α = 65.02(4), β = 66.08(4), γ =71.21(3), *U* = 1170.1(9)Å3, [from 19 reflections measured at ±ω (25  2θ  27.7, λ = 0.71073Å)], *T* = 150(2)K, *D*c = 1.480 gcm-3, *Z* = 1, μ(Mo-*K*α) = 0.643mm-1, *F*(000) = 546.

*Data Collection and Processing*: A colourless, irregular block, 0.67 x 0.54 x 0.43mm was mounted in RS3000 perfluoropolyether oil on a two stage fibre and transferred to a Stoë Stadi-4 four-circle diffractometer, equiped with a low temperature device. Data were acquired using graphite-monochromated Mo-Kα X-radiation using ω-θ scans. Of the 4704 data collected (2θmax = 50, -10  *h*  11, -12  *k*  13, -9  *l*  14), 4001 were unique (Rint = 0.0330) and 3589 had *F*  4σ(*F*). An absorption correction was not applied.

*Structure Analysis and Refinement:* The atoms were located using direct methods and difference Fourier syntheses (SHELXL-97). All fully occupied non-hydrogen atoms were refined anisotropically. The methylene hydrogen atoms were placed geometrically, the methyl hydrogen atoms were located in a difference Fourier synthesis, but the solvent water hydrogen atoms were not found. All hydrogen atoms were allowed to ride on their respective parent atoms. The bridging water molecules were disordered over three sites and, and all free solvent water molecules were of half occupancy. All partially occupied atoms were refined isotropically. At final convergance, *R*1 [*F*  4σ(*F*)] = 0.0605, and *wR*2 [all data] = 0.1697 for 321 parameters. The weighting scheme *w*-1 = [σ2(*F*o2) + (0.0880*P*)2 + 2.8778*P*], where *P* = [MAX(*F*o2, 0) + 2*F*c]/3, gave satisfactory agreement analyses. The largest peaks in the final Fourier synthesis were 1.00 and -0.73eÅ-3. In the final least squares cycle (Δ/σ)max was 0.07.

**Single Crystal X-Ray Structure of {[Ni(L)]2Na4(BF4)2}** **5**

*Crystal Data:* C30H42N8O12B2F8Na4Ni2, *M* = 1089.72, trigonal, space group P31c, *a* = 9.369(3), *c* = 28.603(7)Å, *U* = 2174.5(5)Å3, [from 54 reflections measured at ±ω (24  2θ  32, λ = 0.71073Å)], *T* = 150(2)K, *D*c = 1.664 gcm-3, *Z* = 2, μ(Mo-*K*α) = 1.007 mm-1, *F*(000) = 1112.

*Data Collection and Processing*: A blue hexagonal plate, 0.58 x 0.44 x 0.29mm was mounted on a Stoë Stadi-4 four-circle diffractometer, equiped with a low temperature device. Data were acquired using graphite-monochromated Mo-*K*α *X*-radiation using ω-θ scans. Of the 4749 reflections colleced (2θmax = 50, -11  *h*  11, -9  *k*  11, 0  *l*  34), 1284 were unique (Rint = 0.111) and 1111 had *F*  4σ(*F*). Absorption corrections based on _ scans were applied (*T*min = 0.5928 and *T*Fmax = 0.7589). The crystal was found to have two twinned components related by the twin law (0 1 0 / 1 0 0 / 0 0 -1).

*Structure Analysis and Refinement:* The atoms were located using direct methods and difference Fourier syntheses (SHELXL-97). All fully occupied non-hydrogen atoms were refined anisotropically. The methylene hydrogen atoms were placed geometrically, the methyl hydrogen atoms were located in a difference Fourier synthesis. The hydrogen atoms were allowed to ride on their respective parent atoms. In the asymmetric unit, one arm of [L]3- and one of the Na atoms were disordered over two sites with occupancies of 0.58 and 0.42. These disordered atoms were refined using isotropic thermal parameters with the bond lengths and angles restrained to be the same on both disordered components of the arm. All B-F and F-F distances in the BF4¯ anions were restrained to be equivalent. At final convergance, *R*1 [*F*  4σ(*F*)] = 0.0694, and *wR*2 [all data] = 0.1885 for 198 parameters. The weighting scheme *w*-1 = [σ2(*F*o2) + (0.1128*P*)2 + 3.7435*P*], where *P* = [MAX(*F*o2, 0) + 2*F*c]/3, gave satisfactory agreement analyses. The largest peaks in the final Fourier synthesis were 1.17 and -0.47eÅ-3. In the last least squares cycle (Δ/σ)max was 0.007.
